# Supplementary material for: Immobilization of technetium by iron corrosion phases: lessons learned and future perspectives
Source: Copernicus journal article supplement (doi:10.5194/sand-2-155-2023), 2023-09-06

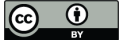

*Supplement of*

## **Immobilization of technetium by iron corrosion phases: lessons learned and future perspectives**

**Natalia Mayordomo et al.**

*Correspondence to:* Natalia Mayordomo (n.mayordomo-herranz@hzdr.de)

The copyright of individual parts of the supplement might differ from the article licence.

# Immobilization of technetium by iron corrosion phases: Lessons learnt and future perspectives

Natalia Mayordomo<sup>1</sup>, Diana M. Rodríguez<sup>1</sup>, Vinzenz Brendler<sup>1</sup>, André Rossberg<sup>1,2</sup>, Andreas C. Scheinost<sup>1,2</sup>, Dieter Schild<sup>3</sup>, Irene Cardaio<sup>1</sup>, Arkadz Bureika<sup>1</sup>, Caroline Börner<sup>1</sup>, and Katharina Müller<sup>1</sup>.

<sup>1</sup>Helmholtz-Zentrum Dresden-Rossendorf, Institute of Resource Ecology, Dresden, 01328, Germany

<sup>2</sup>The Rossendorf Beamline, European Synchrotron Radiation Facility, Grenoble Cedex, 38034, France

<sup>3</sup>Karlsruhe Institute of Technology, Institute for Nuclear Waste Disposal, Eggenstein-Leopoldshafen, 76344, Germany

## <sup>99</sup>Tc as fission product in the environment of a repository for high level radioactive waste

- Long half-life ( $\tau_{1/2} = 0.123$  Ma)
- Poorly retained by the natural and technical materials in the repository

Improving the level of knowledge about their **solubility** and **retention** can, if taken into account in the long-term safety assessment, lead to a significant reduction in uncertainty

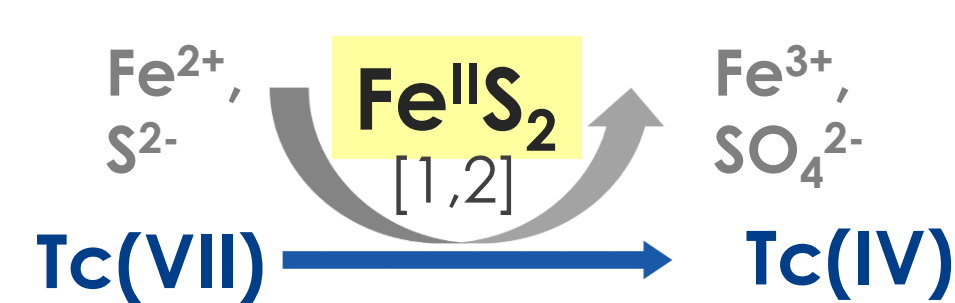

- $\text{TcO}_4^-$
- Almost inert
- **High mobility**
- Different sorption mechanisms [1-5]
- Hardly soluble,  $\text{TcO}_2$  [6-7]
- **Reduced mobility**

## Mobility of contaminants at water-mineral interfaces

### Environmental safety assessment

- To consider **all** processes comprehensively
- Thermodynamic databases need **species verification**

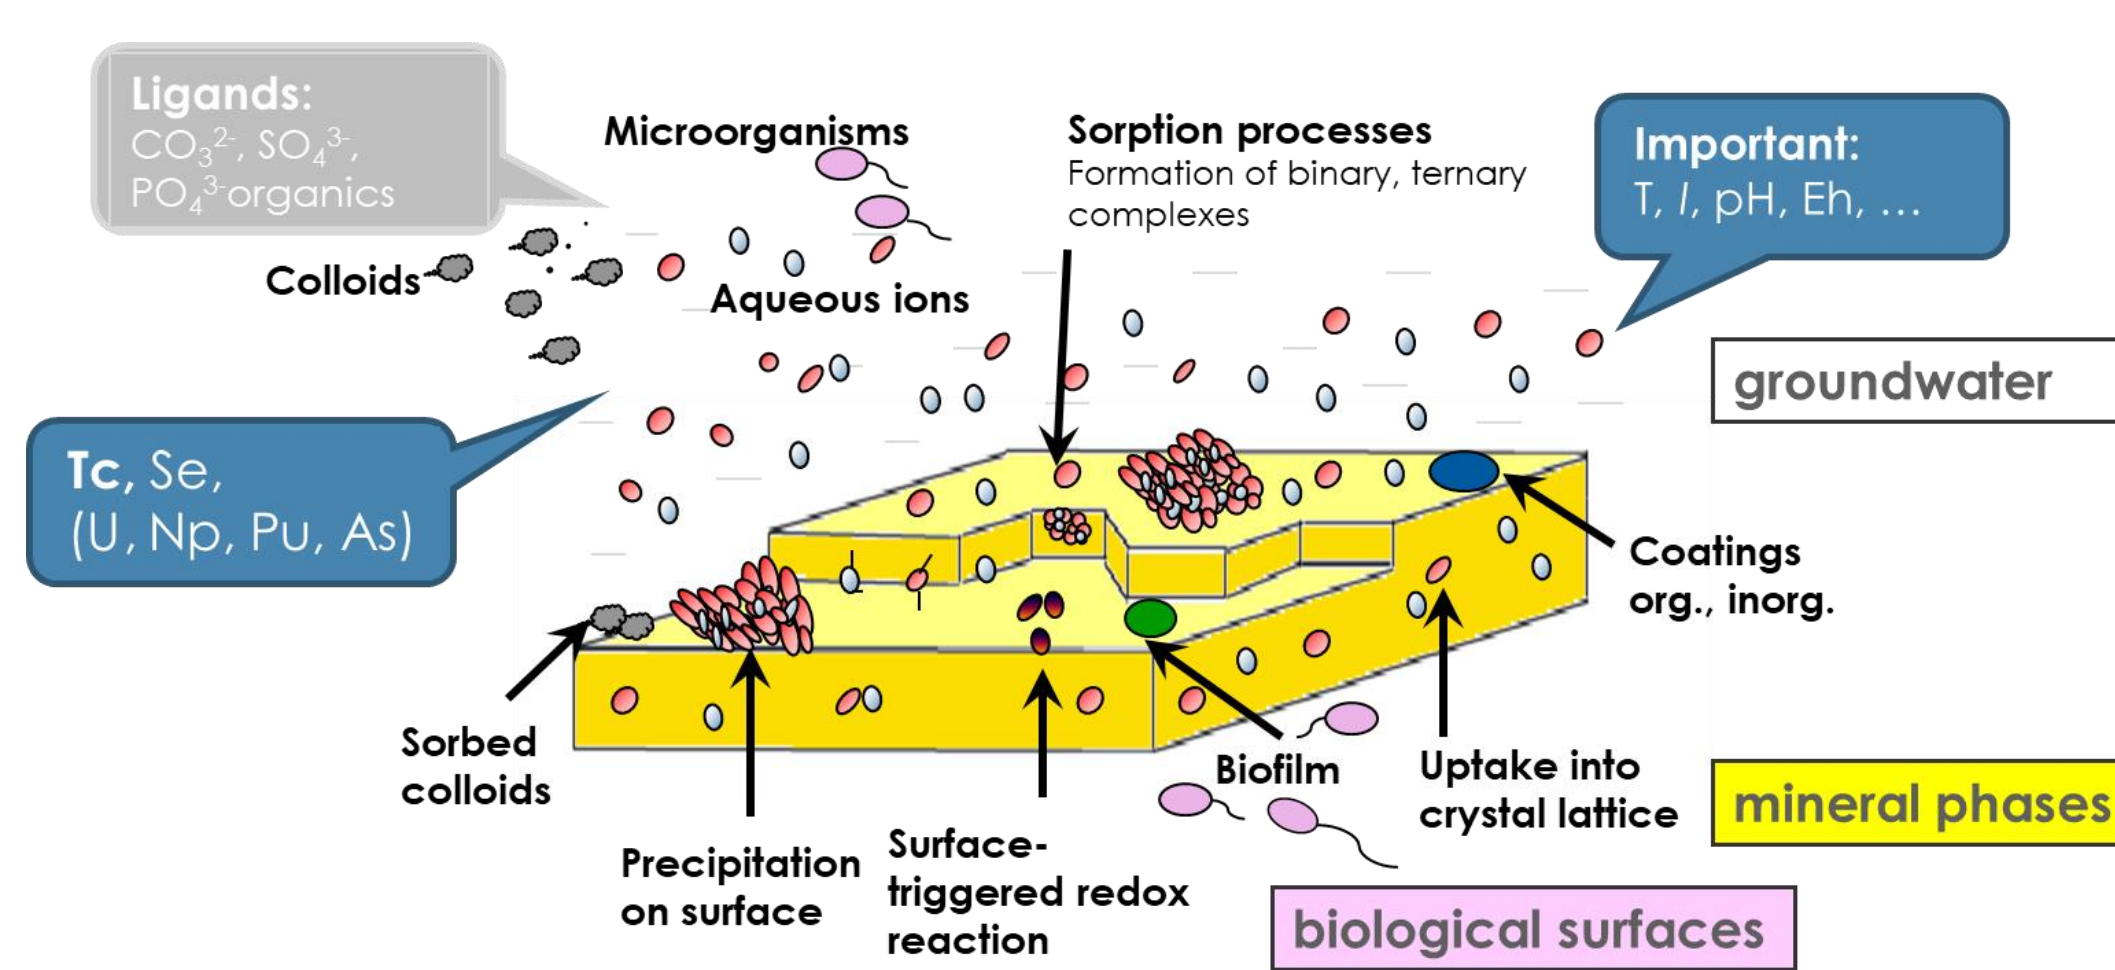

## Tool box for comprehensive molecular understanding

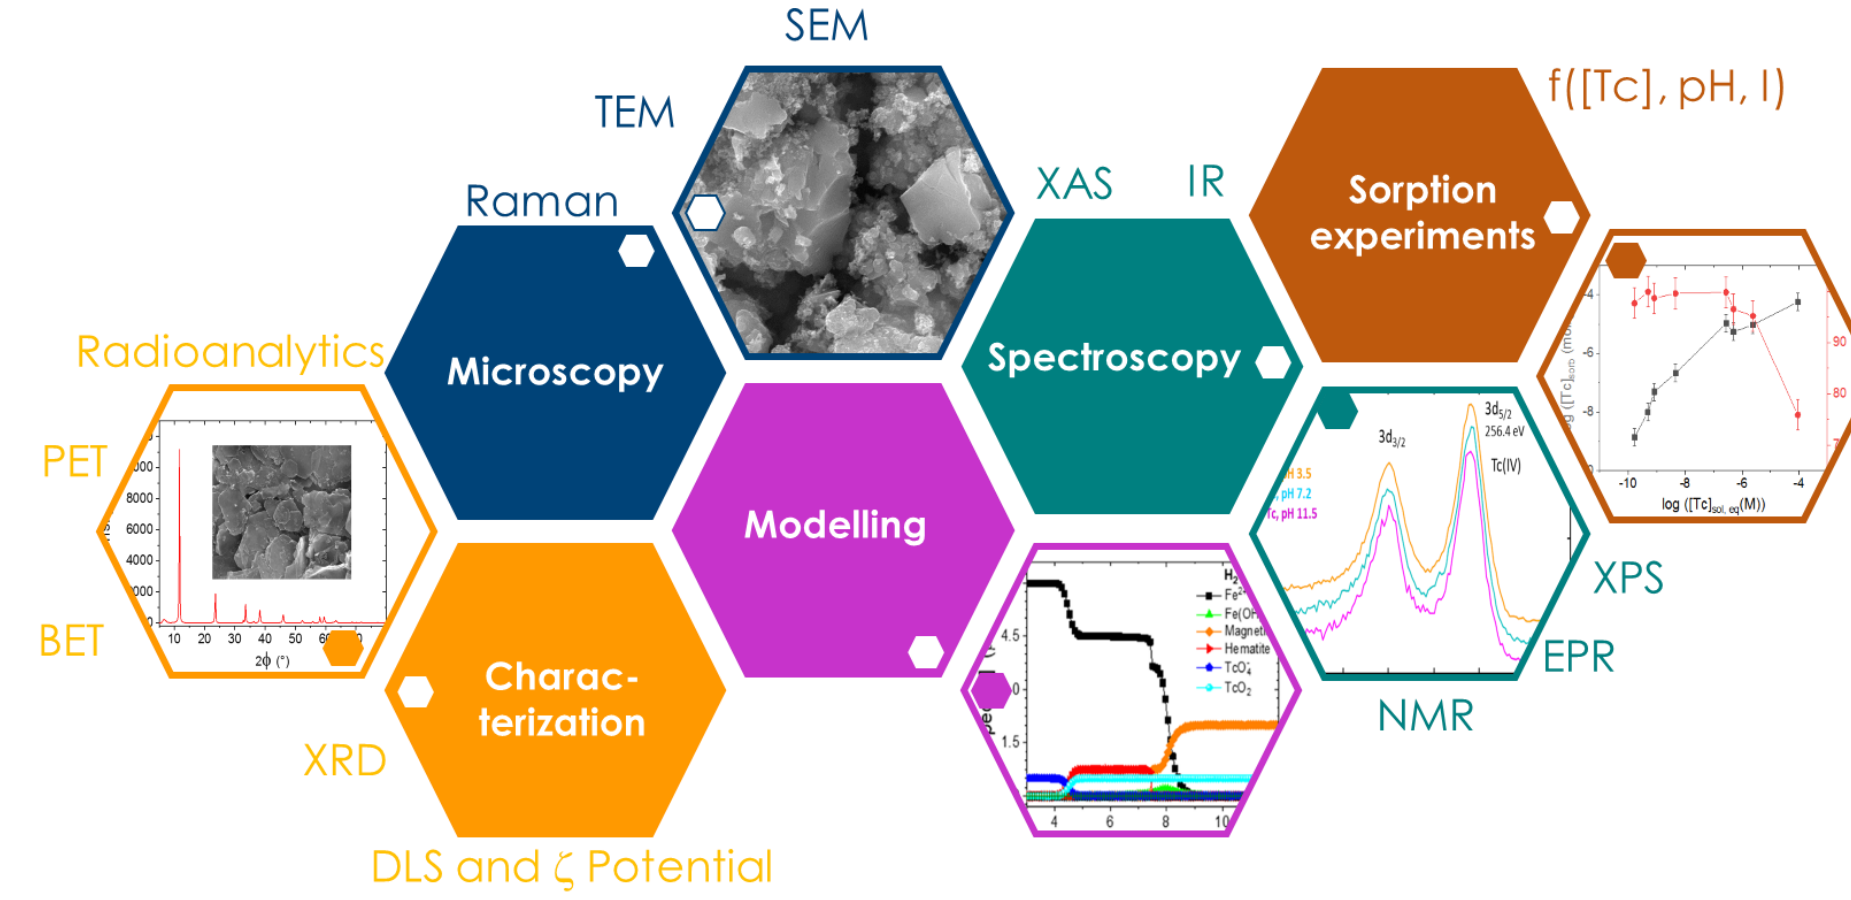

## Lessons learnt

### Characterization of Fe(II) sulfides

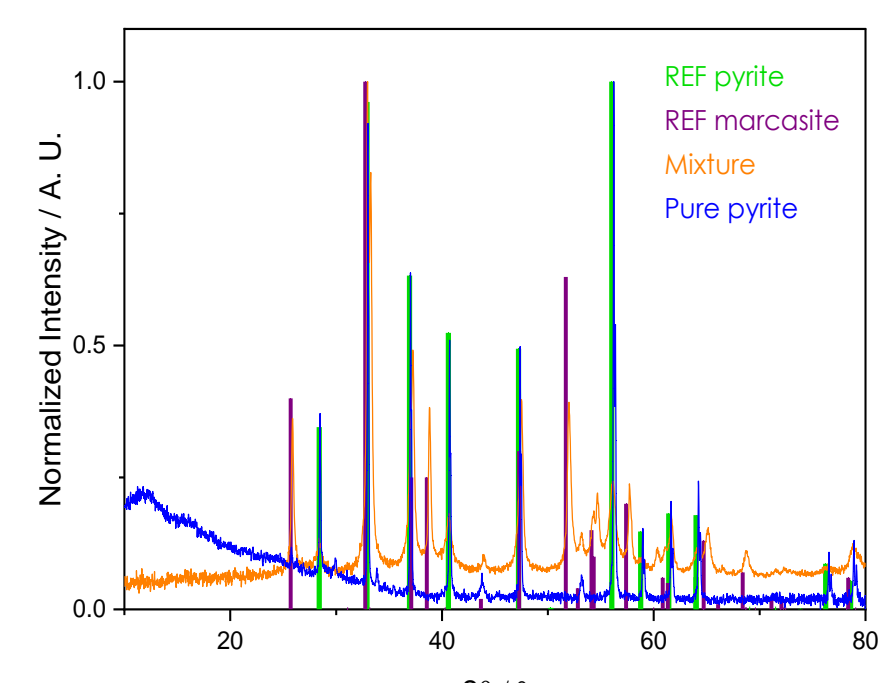

**Pure pyrite:** BET = 2.0 m<sup>2</sup> g<sup>-1</sup>, pH<sub>IEP</sub> = 7.9  
**Mixture 60:40 marcasite-pyrite:**  
BET = 5.3 m<sup>2</sup> g<sup>-1</sup>, pH<sub>IEP</sub> = 7.4

### Batch retention experiments of Tc(VII) on pure pyrite [1] ...

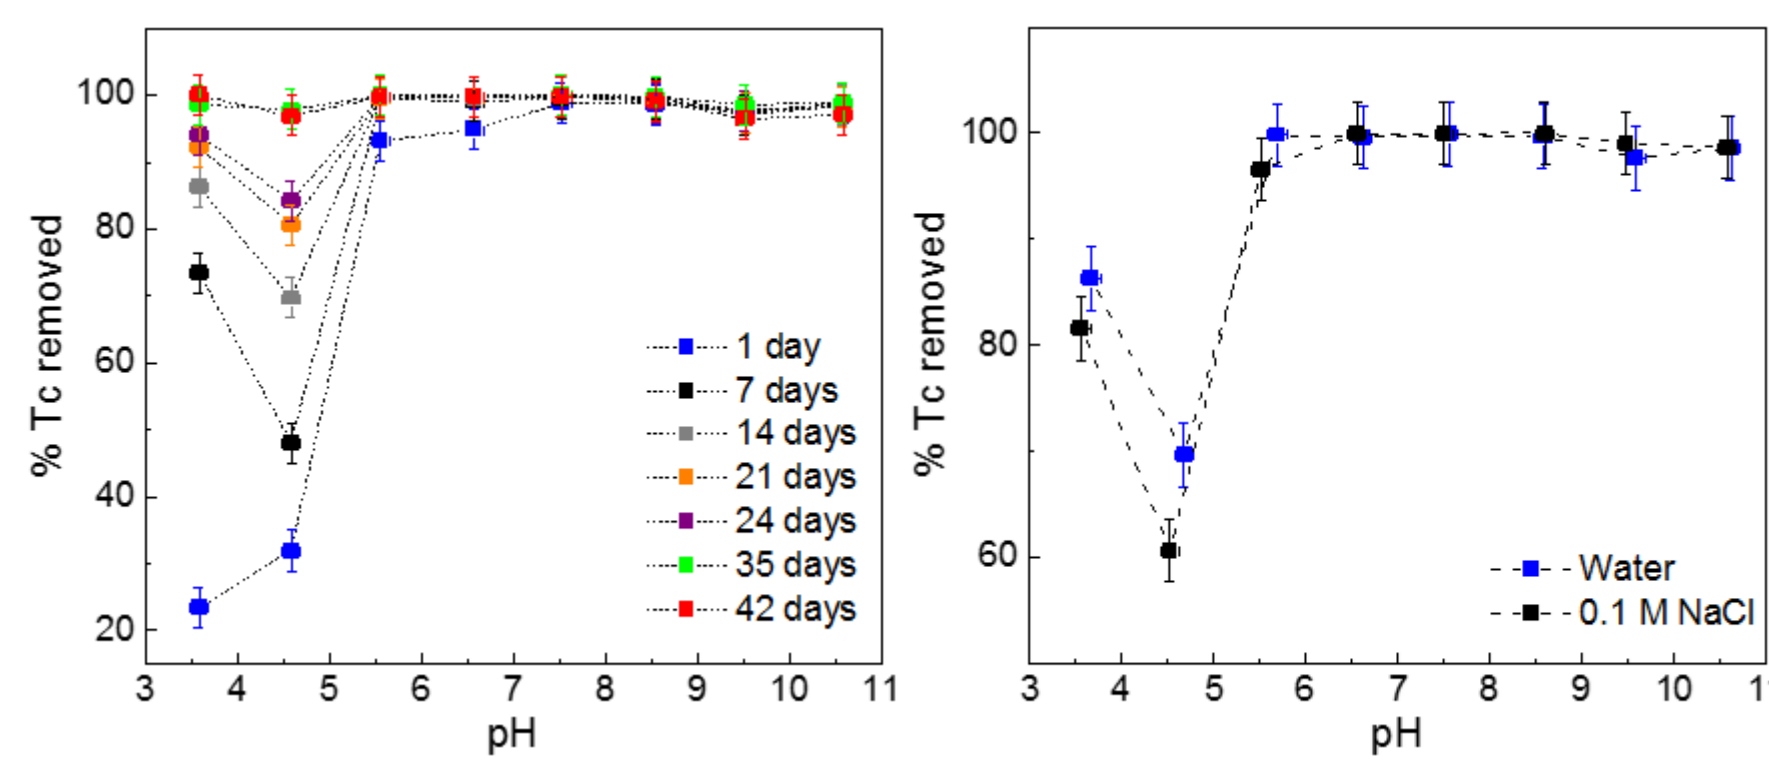

- FeS<sub>2</sub> removes Tc quantitatively at 6 < pH ≤ 9
- Less retention at high pH for mixed sample
- Kinetically controlled processes
- No dependence on ionic strength

### ... and on a mixed marcasite-pyrite sample [2]

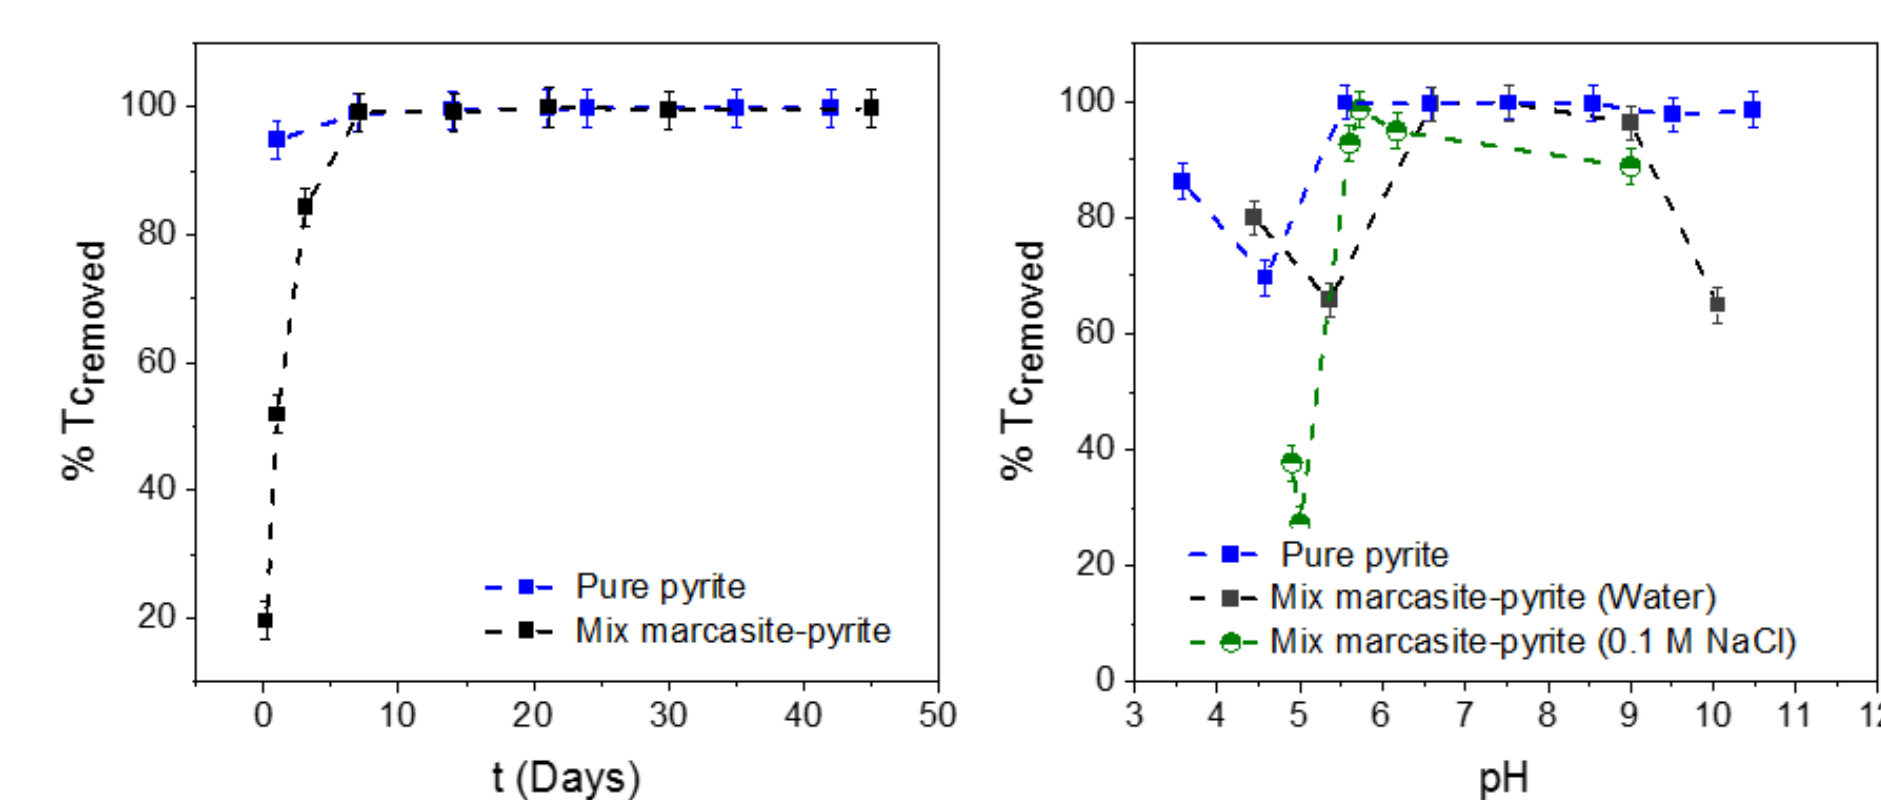

### pH dependent retention mechanisms on pure pyrite [1]

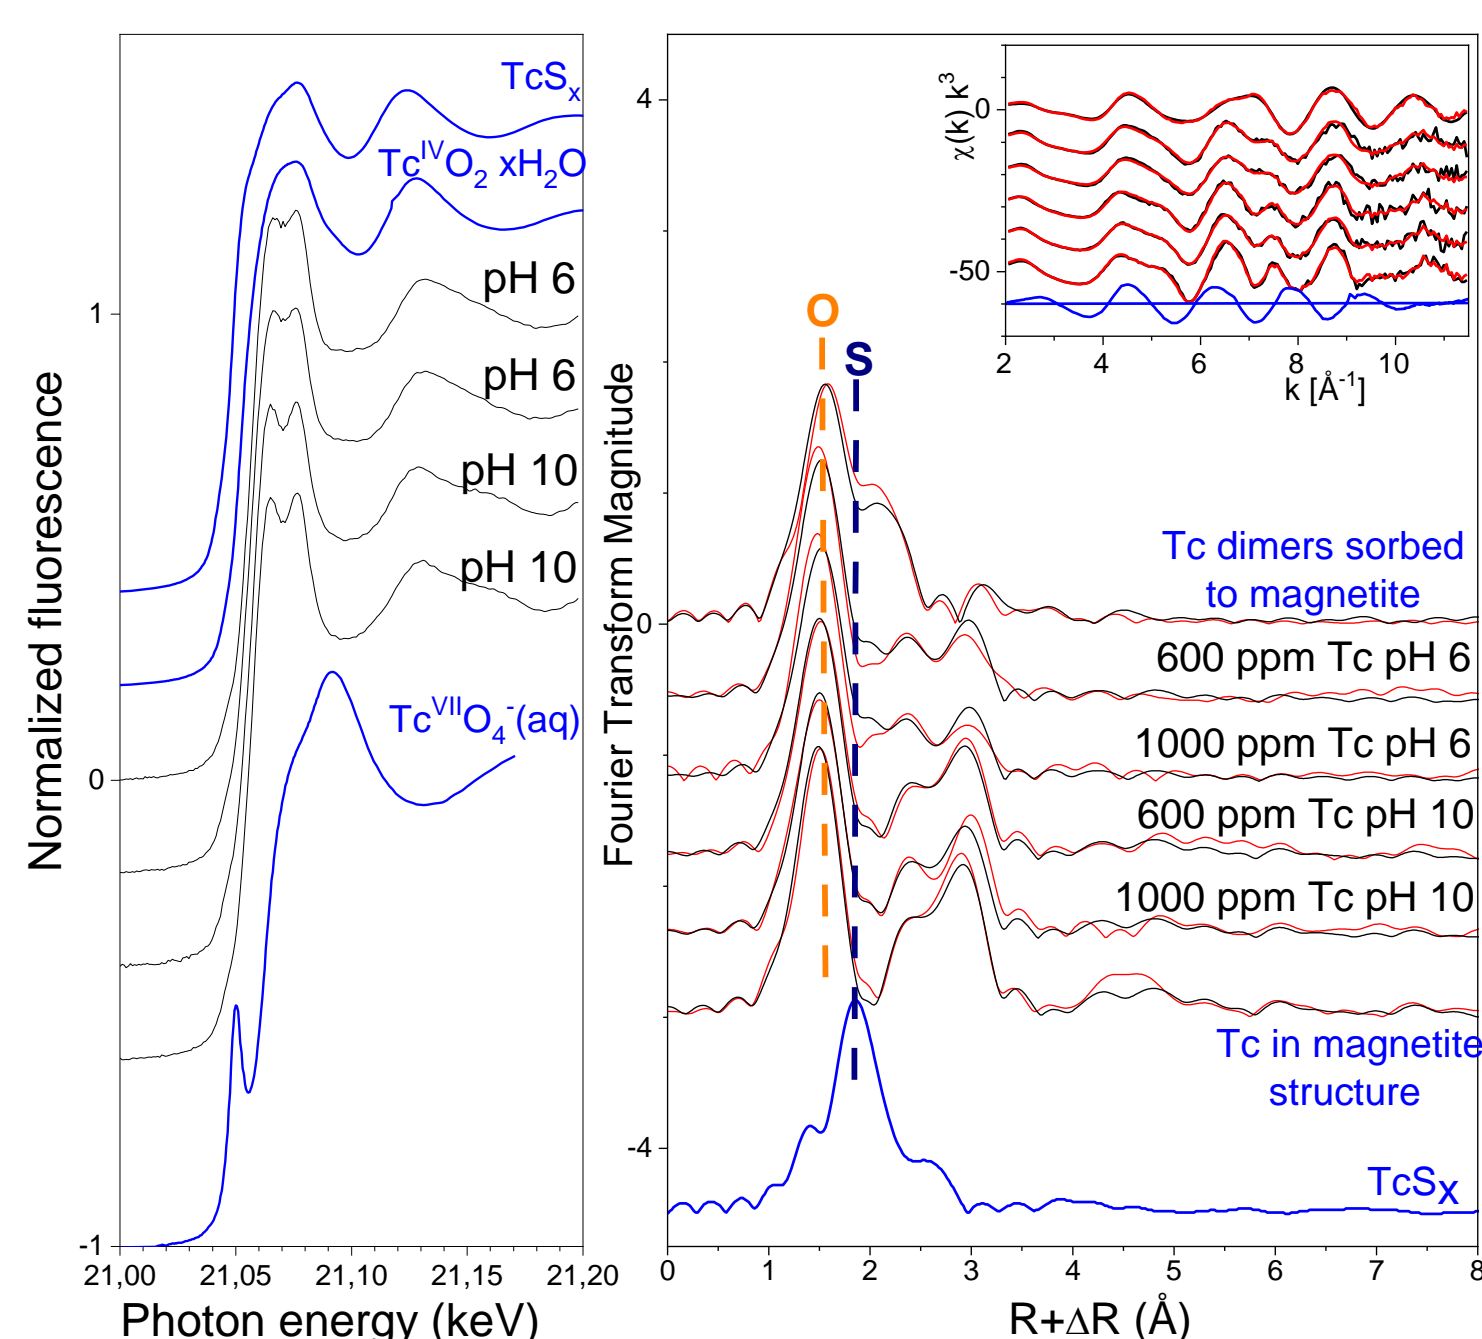

– Tc(IV) coordinated to oxygen

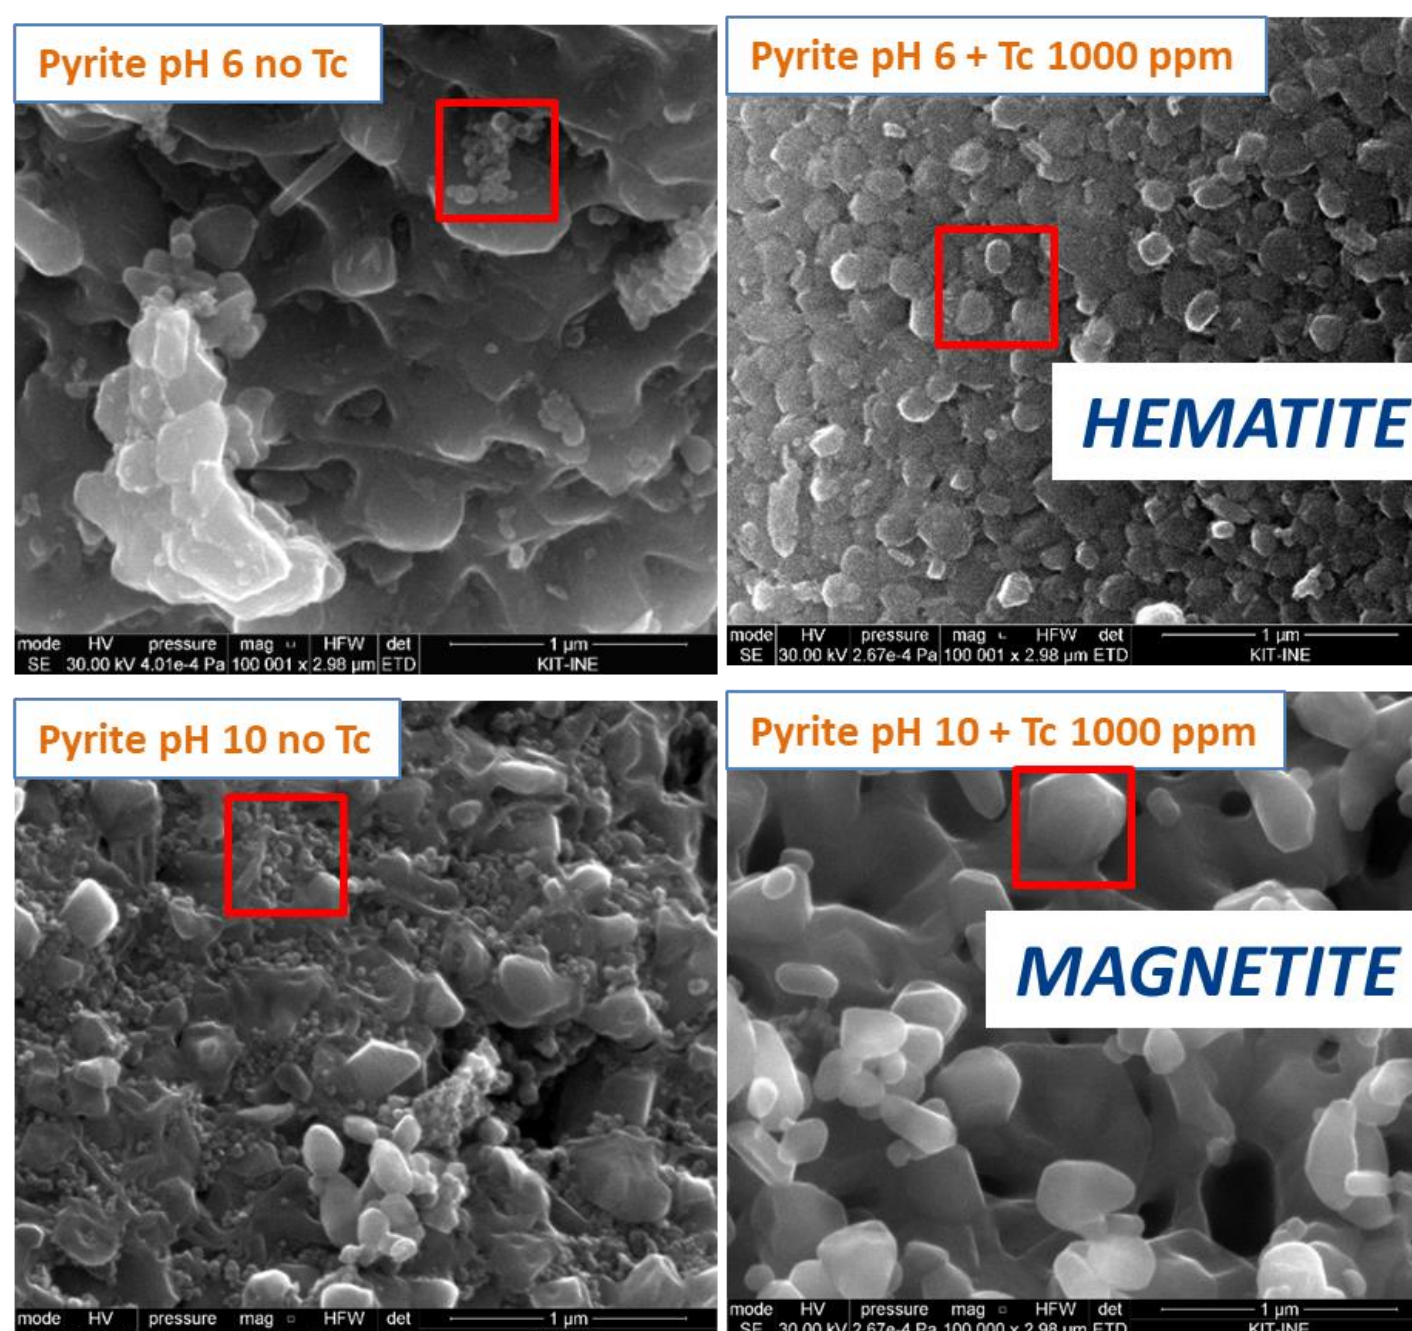

– pH dependent identification of secondary mineral phases

Tc<sup>IV</sup> dimers sorption as inner-sphere complexes (pH 6)

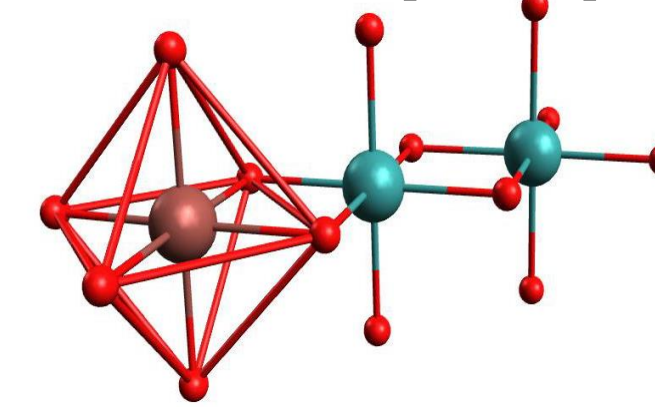

Tc<sup>IV</sup> incorporation, replacing Fe in octahedral position (pH 10)

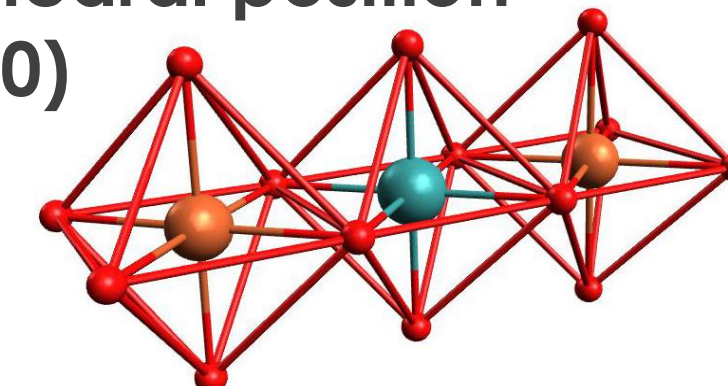

### The impact of marcasite [2]

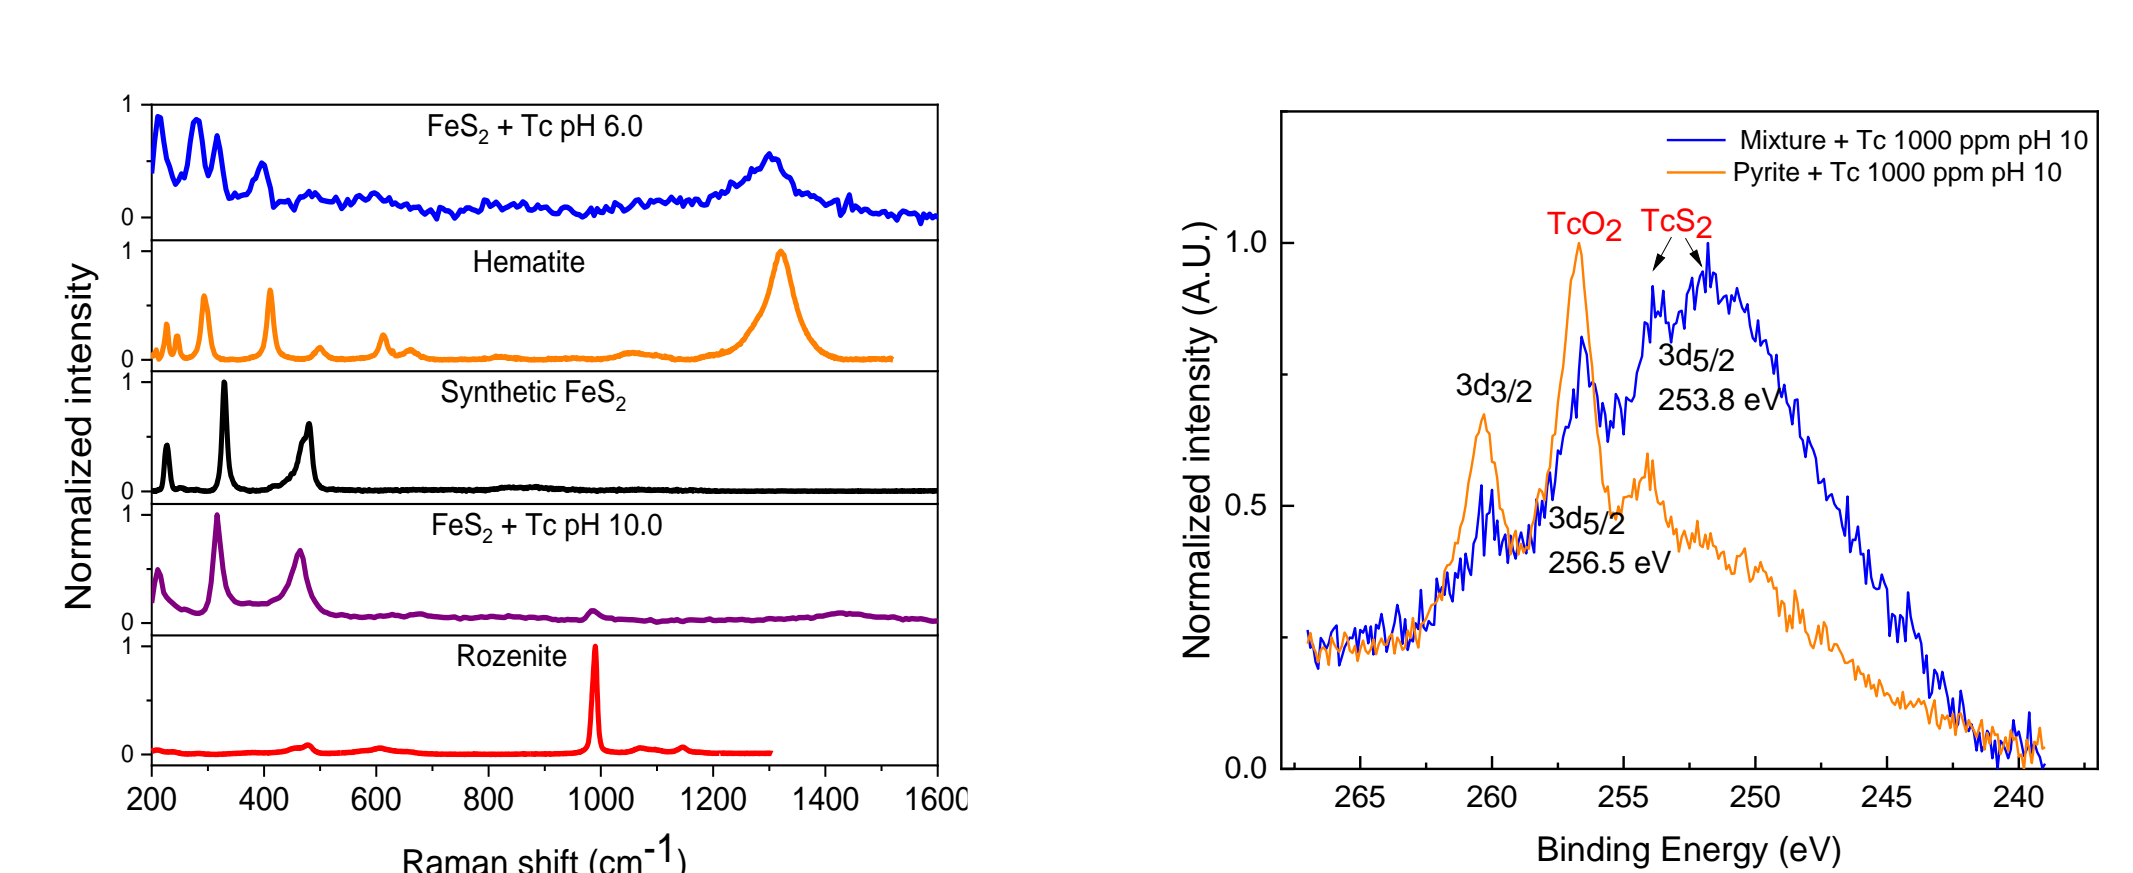

- Retention slower and less effective
- pH 10: Identification of Fe(II)-sulfate mineral
- Presence of TcS<sub>x</sub> at all pHs, possibly passivating the surface preventing further Tc reduction

Indication of the role of S<sup>2-</sup> as reductant in marcasite

## Conclusions & Outlook

- Tc removal by FeS<sub>2</sub> minerals is driven by the reduction from Tc(VII) to Tc(IV)
- Identification of secondary minerals is crucial to decipher Tc-mineral molecular interaction
- Different redox functionalities (Fe<sup>2+</sup> and S<sup>2-</sup>) are responsible
- pH dependent retention mechanisms on both FeS<sub>2</sub>

**Reduced Tc mobility is expected in the near- and far-field of nuclear waste repositories where FeS<sub>2</sub> is abundant e.g., induced by microorganism**

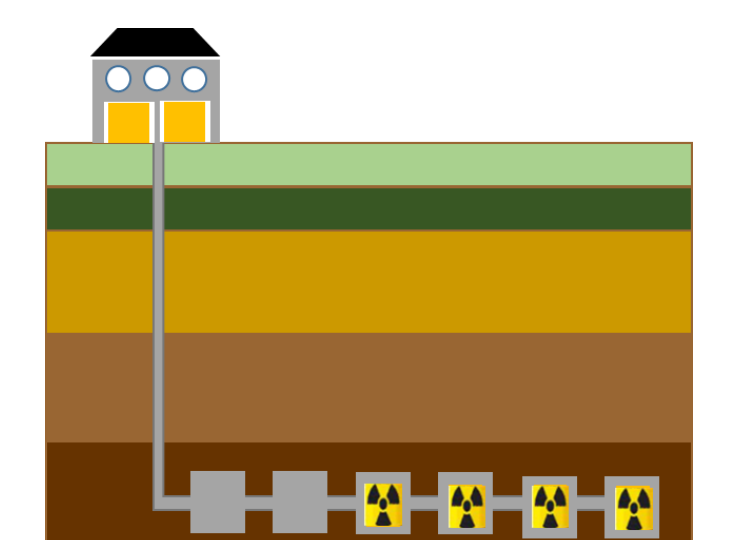

## Future perspectives: study Tc behaviour under more realistic scenarios

### Tasks in the project

- Development of biogeochemical modelling for redox triggered processes
- Determination of Tc thermodynamic data:
  - Redox chemistry of Tc with organics
  - Sorption of Tc in various oxidation states
- Development of methods to observe in-situ molecular characteristics and redox properties

Interaction of Tc with microorganisms

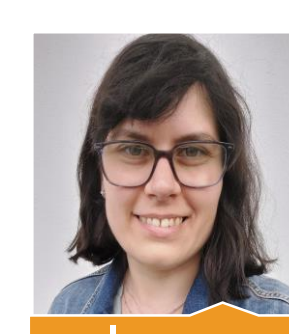

Irene Cardaio

Development of spectro-electrochemical methods

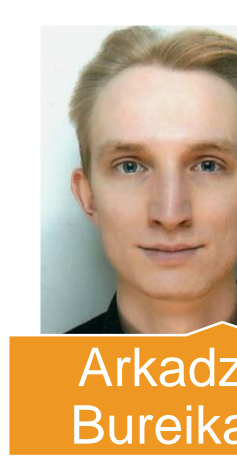

Arkadz Bureika

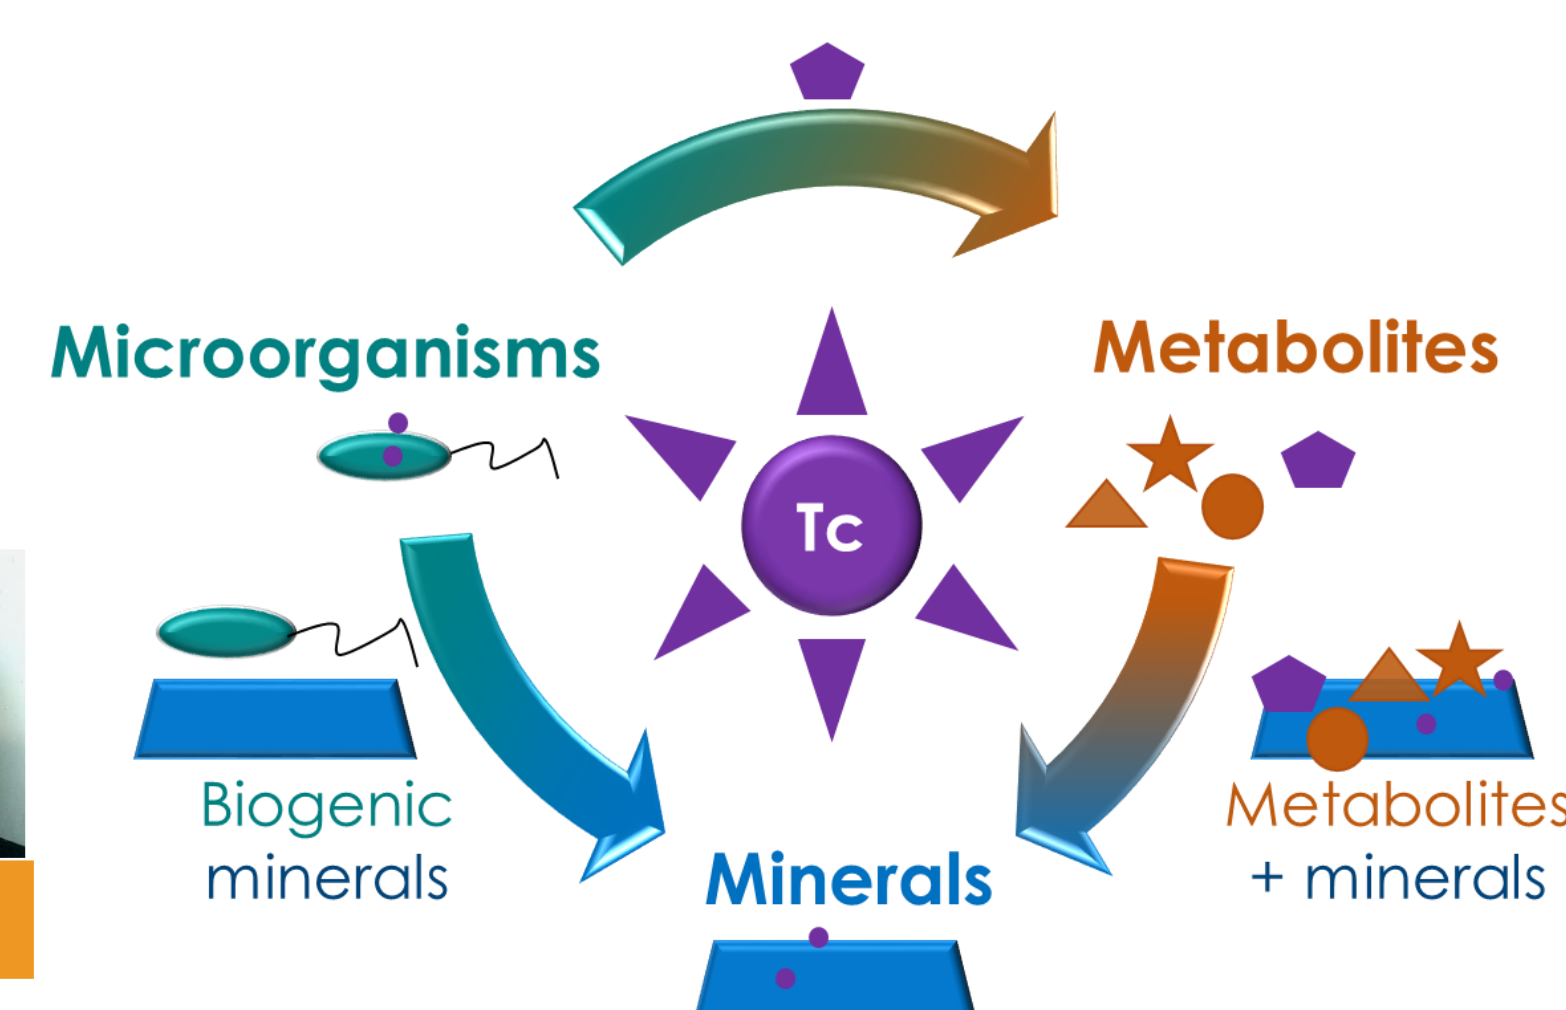

Interaction of metabolites with Tc, and minerals

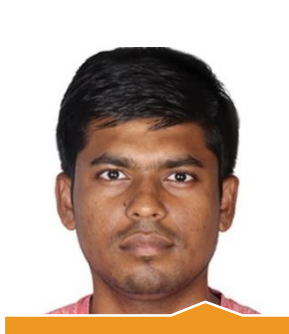

Vijay K. Saini

Interaction of Tc with minerals in presence of metabolites

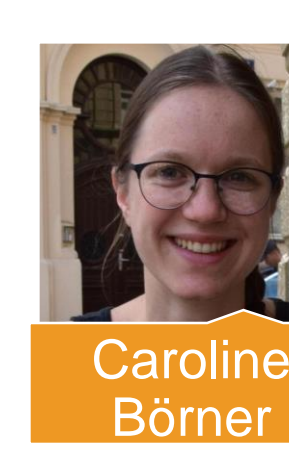

Caroline Börner

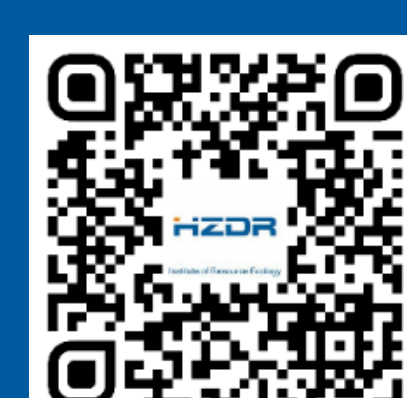

Supplement: Supplementary file 1 [file sand-2-155-2023-supplement.pdf]
